# Supplementary material for: Distinct Nrf2 Signaling Thresholds Mediate Lung Tumor Initiation and Progression
Source: PubMed Central journal article supplement — Cancer Res. 2023 Apr 16;83(12):1953–67. doi: 10.1158/0008-5472.CAN-22-3848 (PMC10267679; doi:10.1158/0008-5472.can-22-3848), 2023-04-16
Supplement: can-22-3848_figure_s1_suppsf1.pdf [file can-22-3848_figure_s1_suppsf1.pdf]

**A** CA-Keap1<sup>R554Q</sup> allele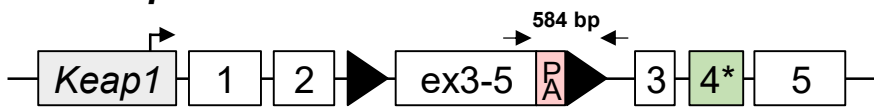**B** WT Keap1 allele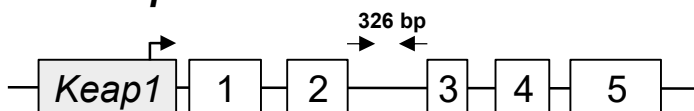**C**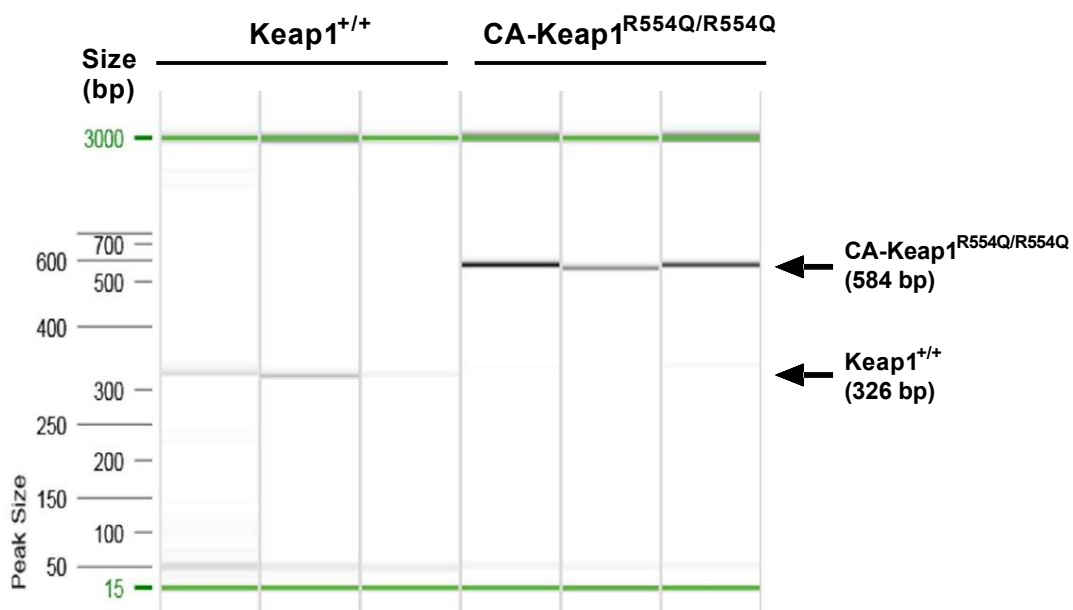**D**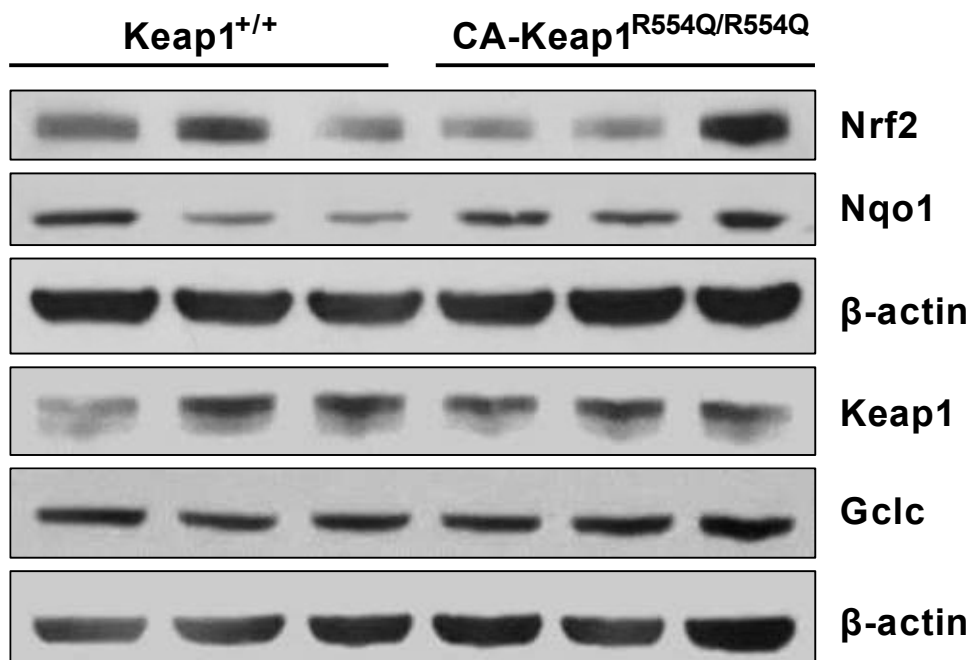

**Figure S1. The CA-Keap1<sup>R554Q</sup> allele is not hypomorphic.** Schematic of **(A)** CA-Keap1<sup>R554Q</sup> and **(B)** WT Keap1 alleles with genotyping primers. **(C)** Detection of CA-Keap1<sup>R554Q</sup> and WT Keap1 by QIAxcel electrophoresis. **(D)** Western blot analysis of Nrf2, Nqo1, Keap1, Gclc, and  $\beta$ -actin expression in WT Keap1 and CA-Keap1<sup>R554Q/R554Q</sup> MEFs (n=3 individual MEF lines from each genotype).
