# Supplementary material for: Distinct Nrf2 Signaling Thresholds Mediate Lung Tumor Initiation and Progression
Source: PubMed Central journal article supplement — Cancer Res. 2023 Apr 16;83(12):1953–67. doi: 10.1158/0008-5472.CAN-22-3848 (PMC10267679; doi:10.1158/0008-5472.can-22-3848), 2023-04-16
Supplement: can-22-3848_figure_s2_suppsf2.pdf [file can-22-3848_figure_s2_suppsf2.pdf]

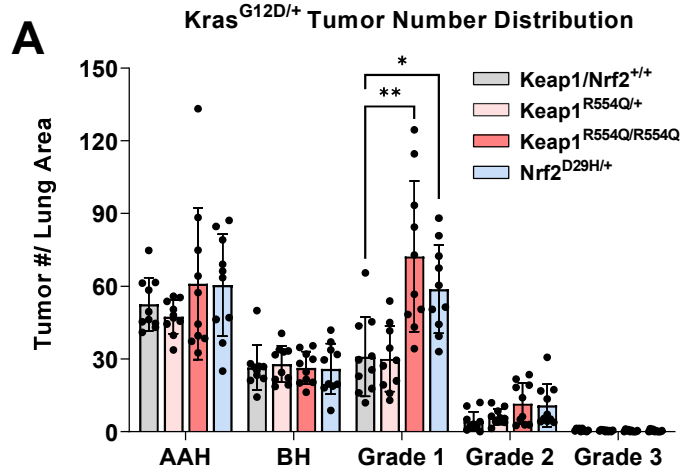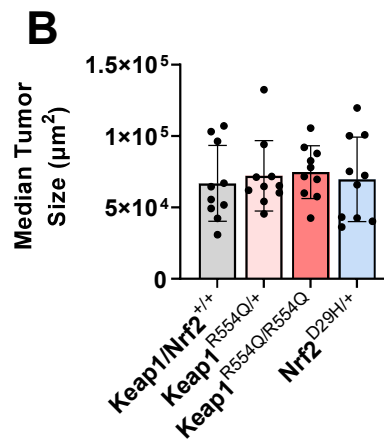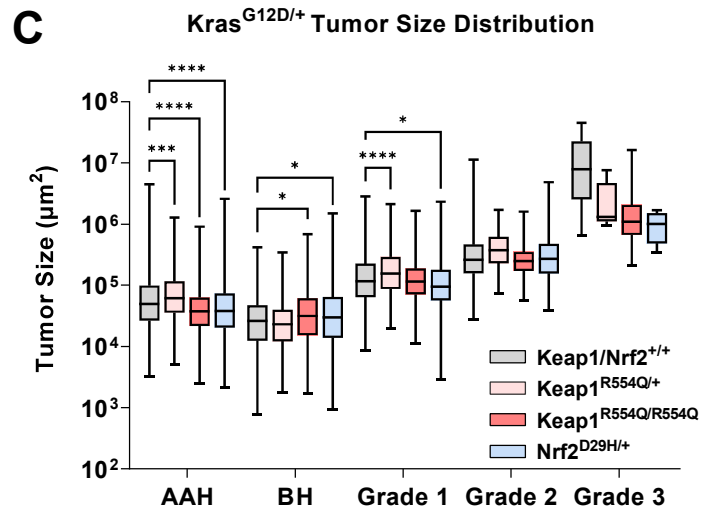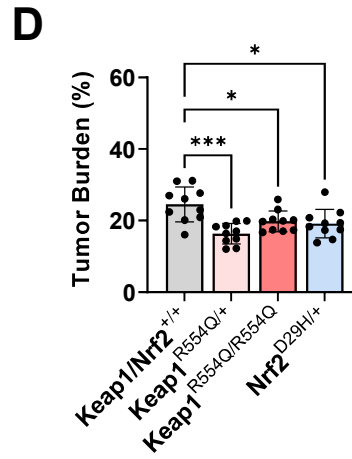

**Figure S2. Lung tumor burden, size, and number quantification in the *Kras*<sup>G12D/+</sup> model with *Keap1/Nrf2* mutation. (A)** Distribution of tumor number by grade across *Keap1/Nrf2* mutant models. N=10 mice per genotype, \*p<0.05 (unpaired t test with Holm-Sidak's multiple comparisons test). **(B)** Median tumor size per mouse for each genotype. \*p<0.05 (one-way ANOVA). **(C)** Tumor size by grade across all mice per genotype. N=10 mice and  $\geq 2,300$  tumors per genotype, \*p<0.05 (Kruskal-Wallis test with Dunn's multiple comparisons test). **(D)** Overall tumor burden (%) calculated by dividing the total area of lung tumor by the total area of the lung. \*p<0.05 (one-way ANOVA).
