# Supplementary material for: Distinct Nrf2 Signaling Thresholds Mediate Lung Tumor Initiation and Progression
Source: PubMed Central journal article supplement — Cancer Res. 2023 Apr 16;83(12):1953–67. doi: 10.1158/0008-5472.CAN-22-3848 (PMC10267679; doi:10.1158/0008-5472.can-22-3848), 2023-04-16
Supplement: can-22-3848_figure_s4_suppsf4.pdf [file can-22-3848_figure_s4_suppsf4.pdf]

**Figure S4. Immunohistochemical analysis of Nrf2 and Nqo1 across tumor grades in the  $Kras^{G12D/+}$ ;  $p53^{fl/fl}$  model with single copy Nrf2 deletion. (A, B) Heatmaps depicting the H-scores per grade from IHC staining for Nrf2 (nuclear) (A) and the Nrf2 target Nqo1 (whole cell) (B). N=3 mice per genotype, >20,000 tumor cells per mouse. Only one grade 4 and one grade 5 tumor were found in the  $Keap1^{R554Q/R554Q}$ ;  $Nrf2^{+/+}$  cohort, and therefore were excluded from these analyses.**
