# Supplementary material for: Distinct Nrf2 Signaling Thresholds Mediate Lung Tumor Initiation and Progression
Source: PubMed Central journal article supplement — Cancer Res. 2023 Apr 16;83(12):1953–67. doi: 10.1158/0008-5472.CAN-22-3848 (PMC10267679; doi:10.1158/0008-5472.can-22-3848), 2023-04-16
Supplement: can-22-3848_figure_s5_suppsf5.pdf [file can-22-3848_figure_s5_suppsf5.pdf]

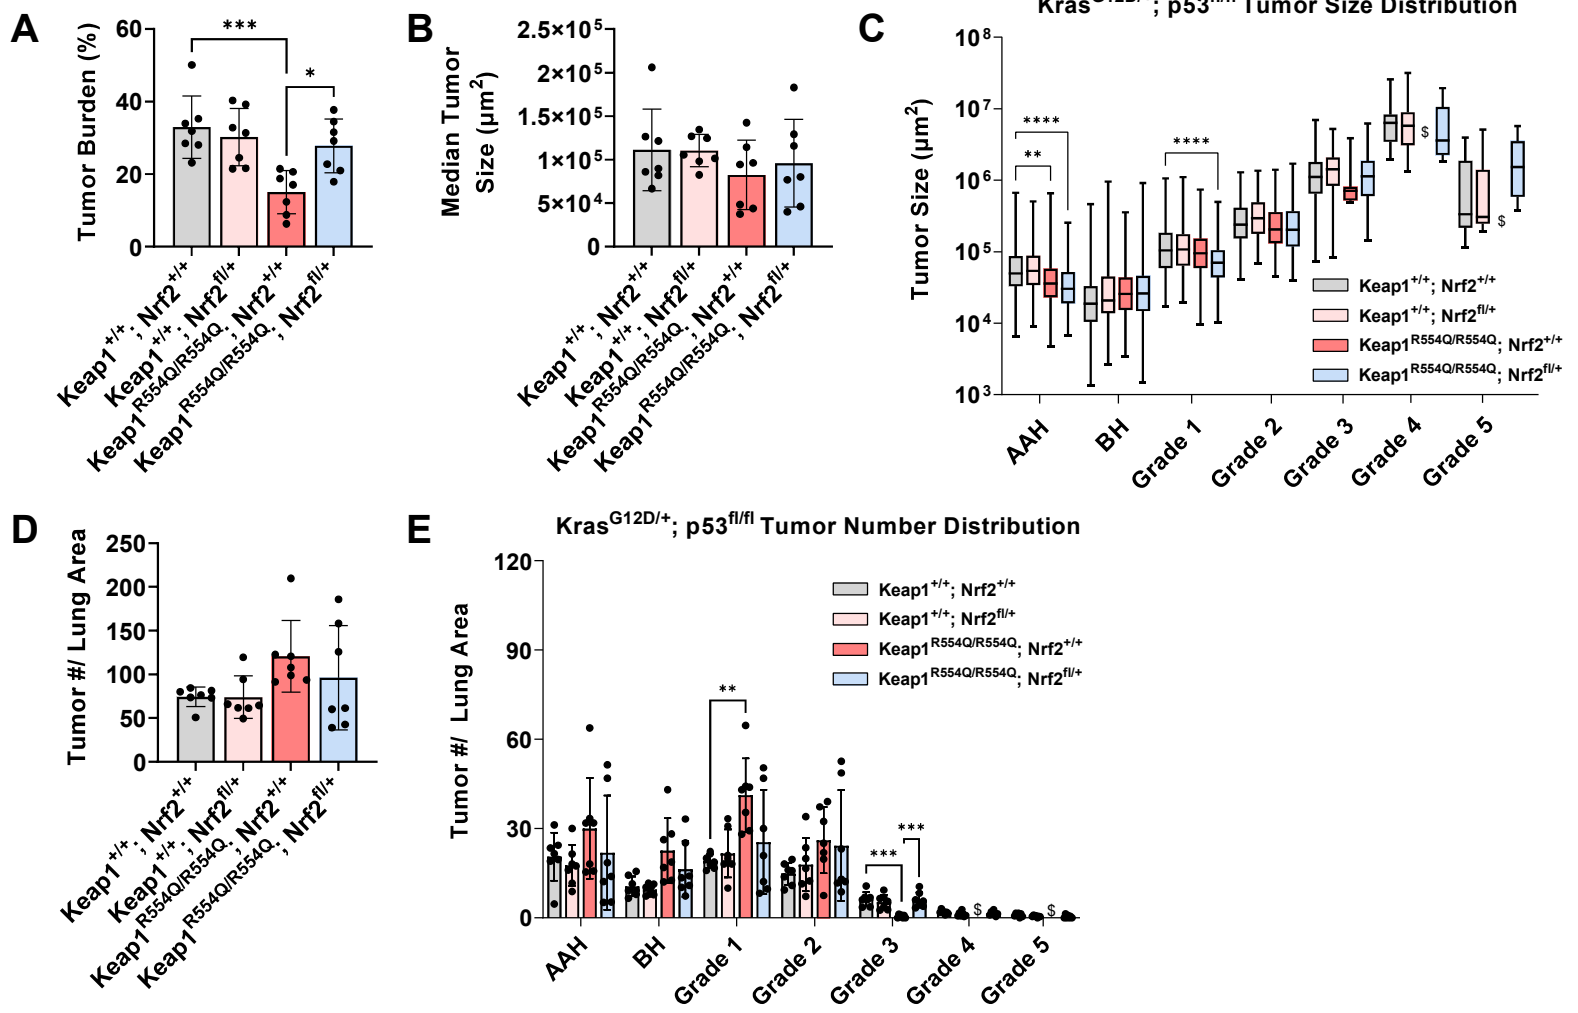

**Figure S5. Lung tumor burden, size, and number quantification in the *Kras*<sup>G12D/+</sup>; *p53*<sup>fl/fl</sup> model with single copy *Nrf2* deletion. (A) Overall tumor burden (%) calculated by dividing the total area of lung tumor by the total area of the lung. (B) Median tumor size per mouse for each genotype. For (A, B), \**p*<0.05 (one-way ANOVA). (C) Tumor size across all mice per genotype. N=7 mice and  $\geq 1,000$  tumors per genotype. \**p*<0.05 (Kruskal-Wallis test with Dunn's multiple comparisons test). \$ = fewer than 3 tumors detected across all mice. (D) Tumor number per mouse normalized to lung area. \**p*<0.05 (one-way ANOVA). (E) Distribution of tumor number by grade across *Keap1/Nrf2* mutant models. N=7 mice per genotype, \**p*<0.05 (unpaired t test with Holm-Sidak's multiple comparisons test). \$ = fewer than 3 tumors detected across all mice. For (C) and (E), only one grade 4 and two grade 5 tumors were found in the *Keap1*<sup>R554Q/R554Q</sup>; *Nrf2*<sup>+/+</sup> cohort, and therefore were excluded from these analyses.**
